# Supplementary material for: Microstructure and Texture Evolution of Hot-Rolled Mg-3Gd Alloy during Recrystallization
Source: MDPI journal article supplement (doi:10.3390/met13071216), 2023-06-30
Supplement: s1 [file s1]

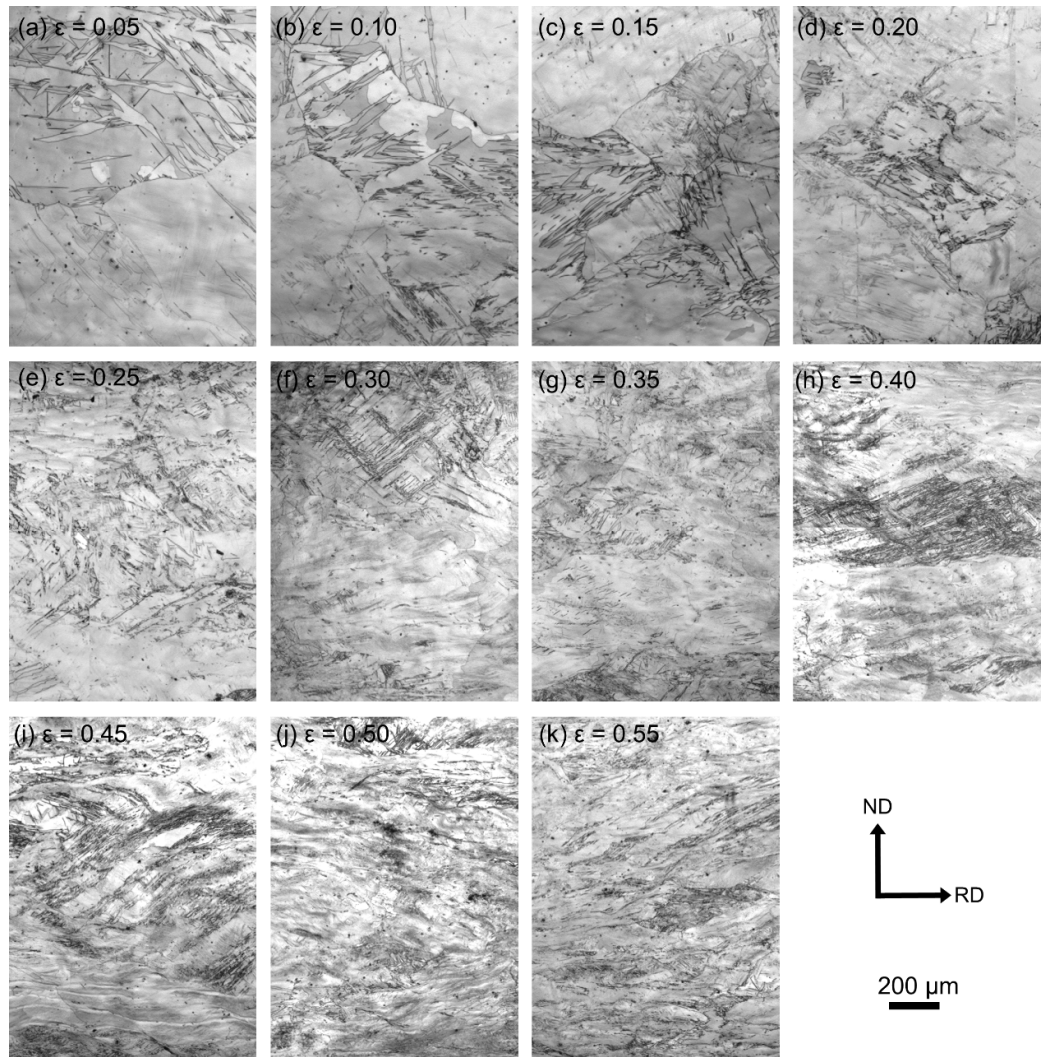

**Figure S1.** Microstructures with higher magnification of the as-hot-rolled sample at locations of different rolling strains: (a)  $\epsilon = 0.05$ , (b)  $\epsilon = 0.10$ , (c)  $\epsilon = 0.15$ , (d)  $\epsilon = 0.20$ , (e)  $\epsilon = 0.25$ , (f)  $\epsilon = 0.30$ , (g)  $\epsilon = 0.35$ , (h)  $\epsilon = 0.40$ , (i)  $\epsilon = 0.45$ , (j)  $\epsilon = 0.50$ , (k)  $\epsilon = 0.55$ .

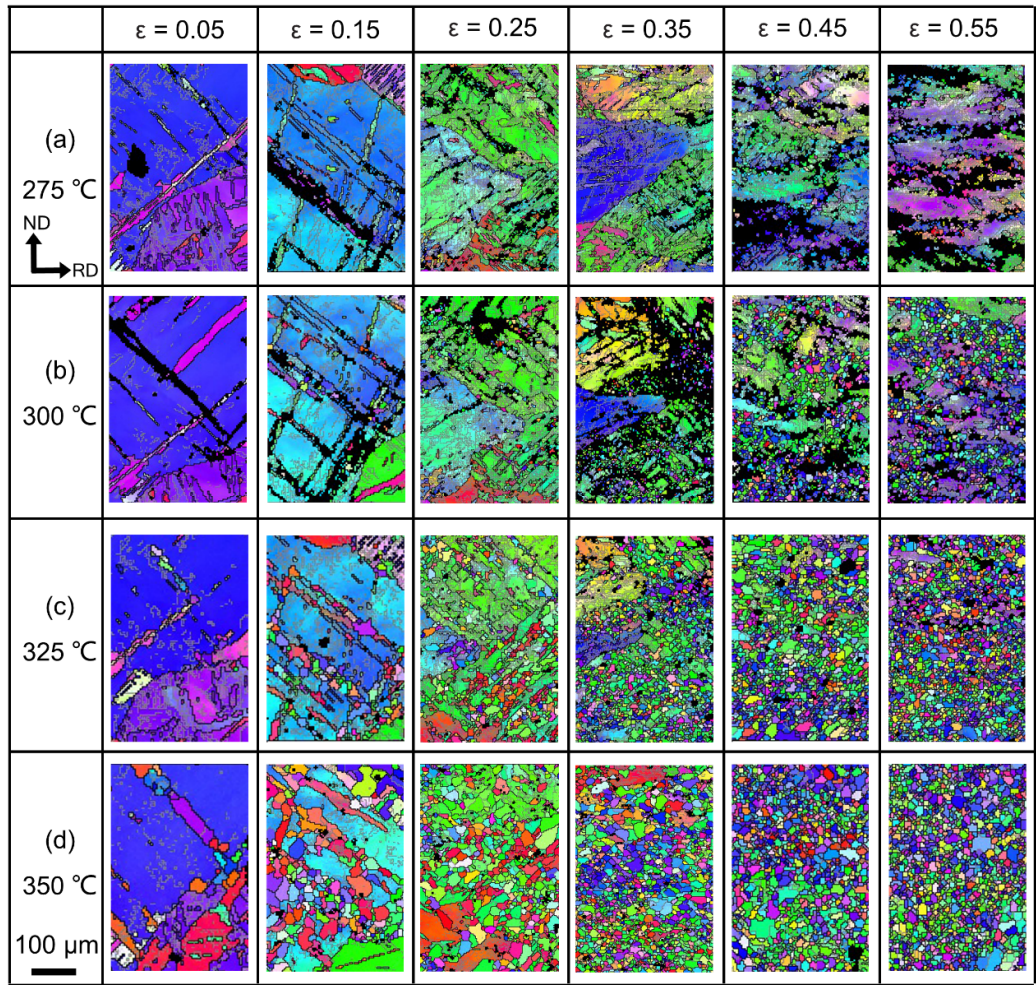

**Figure S2.** EBSD inverse pole figure (IPF) maps with high magnification of the hot-rolled sample annealed at different temperatures for 1 h: (a) 275 °C, (b) 300 °C, (c) 325 °C, (d) 350 °C. Observation along TD was applied to the IPF triangle.
